# Contribution of *de novo* non-coding mutations to autism and identification of risk genes from whole-genome sequencing of affected families

Yuwen Liu<sup>1</sup>, Ercument Cicek<sup>2,3</sup>, Yanyu Liang<sup>3</sup>, Jinchen Li<sup>4,6,10</sup>, Rebecca Muhle<sup>7,8,9</sup>, Nicholas Knoblauch<sup>5</sup>, Martina Krenzer<sup>9</sup>, Yue Mei<sup>4</sup>, Yan Wang<sup>4</sup>, Yi Jiang<sup>6,10</sup>, Evan Geller<sup>7,9</sup>, Zhongshan Li<sup>6</sup>, Iuliana Ionita-Laza<sup>11</sup>, Jinyu Wu<sup>4,6</sup>, Kun Xia<sup>10</sup>, James Noonan<sup>7,9</sup>, Zhong Sheng Sun<sup>4,6\*</sup> & Xin He<sup>1\*</sup>

<sup>1</sup>Department of Human Genetics, The University of Chicago, Chicago, IL, USA. <sup>2</sup>Computer Engineering Department, Bilkent University, Ankara, Turkey. <sup>3</sup>Computational Biology Department, School of Computer Science, Carnegie Mellon University, Pittsburgh, PA, USA. <sup>4</sup>Beijing Institutes of Life Science, Chinese Academy of Sciences, Beijing, China. <sup>5</sup>Committee on Genetics, Genomics and Systems Biology, The University of Chicago, Chicago, IL, USA. <sup>6</sup>Institute of Genomic Medicine, Wenzhou Medical University, Wenzhou, China. <sup>7</sup>Department of Genetics, Yale School of Medicine, New Haven, Connecticut, USA. <sup>8</sup>Child Study Center, Yale Medicine, New Haven, Connecticut, USA. <sup>9</sup>Kavli Institute for Neuroscience, Yale School of Medicine, New Haven, Connecticut, USA. <sup>10</sup>The State Key Laboratory of Medical Genetics, School of Life Sciences, Central South University, Changsha, Hunan, China. <sup>11</sup>Department of Biostatistics, Columbia University, New York, New York, USA. \*Correspondence should be addressed to S.Z. ([sunzs@mail.biols.ac.cn](mailto:sunzs@mail.biols.ac.cn)) or H.X. ([xinhe@uchicago.edu](mailto:xinhe@uchicago.edu)).

# **Abstract**

Analyzing de novo mutations (DNMs) in protein-coding genes from whole-exome sequencing (WES) data has emerged as a powerful tool for mapping risk genes of autism spectrum disorder (ASD). The impact of non-coding mutations in ASD, however, has been largely unknown. This represents a large gap in our understanding of the genetics of ASD, as the majority of GWAS hits for a range of disorders fall into non-coding regions. To address this question, we performed a meta-analysis of DNMs using whole-genome sequencing (WGS) data from more than 300 individuals with ASD. We found that DNMs are enriched within brain transcriptional regulatory elements near genes involved in neuropsychiatric disorders. In these genes and in evolutionarily constrained genes, we also found an excess of DNMs that are predicted to affect pre-mRNA splicing. Collectively, we estimate that non-coding mutations explain at least one third of the ASD genetic risk attributable to DNMs. By combining information of non-coding DNMs with published WES data, we identified three new ASD risk genes at a false discovery rate (FDR)  $< 0.1$ , and 11 at a FDR  $< 0.3$ . A number of these genes are known to regulate critical processes in neural development and have been associated with other neuropsychiatric disorders. Taken together, our results demonstrate the pathogenic contribution of non-coding DNMs in ASD etiology and highlight some promising ASD risk genes. The analytic tools we provided in this study, for estimating contribution of non-coding mutations to disease risk and for mapping susceptibility genes using both coding and regulatory mutations, are applicable to any WGS studies on DNMs.

# Introduction

Autism spectrum disorder (ASD) is a neurodevelopmental disorder with onset in early childhood<sup>1,2</sup>. Understanding the genetics of ASD would help understand the etiology of the disorder and may lead to the development of more effective diagnostics and therapies<sup>3</sup>. Nonetheless, ascribing ASD genetic risk to specific genomic loci has proved challenging. GWAS have only yielded a handful of small-effect variants that have not replicated between studies<sup>4,5</sup>. In contrast, screening for *de novo* mutations (DNMs) with potentially larger effect sizes has emerged as an effective approach for identifying ASD risk loci. Several large whole-exome sequencing (WES) studies have been performed on ASD parent-child trios or quartets<sup>6-9</sup>, based on the principle that genes harboring an excess of deleterious DNMs are likely risk genes. These studies have identified approximately 70 ASD risk genes.

Compared with coding mutations, the contribution of noncoding mutations to ASD etiology is largely unknown. For a wide range of diseases and traits, the majority of GWAS hits fall into noncoding regions<sup>10</sup>. Non-coding variants may alter the activity of cis-regulatory elements or affect the splicing of pre-mRNAs, which may in turn alter gene dosage and isoform usage<sup>11-15</sup>. Beyond implicating specific disease-associated loci, knowledge of non-coding variants can also offer clues as to which cell types are relevant to disease etiology and how trans-acting genes may contribute to disease risk<sup>12,16</sup>. In the case of autism, disruption of chromatin remodeling, histone modification, and pre-mRNA splicing have been implicated in the disease<sup>8,17-22</sup>. Taken together, these results support the role of transcriptional mis-regulation in ASD etiology. Nevertheless, with few exceptions<sup>23</sup>, most existing ASD studies focused on coding sequences, and little is known about cis-regulatory variants predisposing autism risk.

In this study, we explore the contribution of non-coding mutations to ASD by combining data from multiple whole-genome sequencing (WGS) studies in autism trios. We developed a computational framework to analyze whole-genome DNM data (Fig. 1). To assess the extent non-coding mutations contribute to autism risk, we compared the rates of DNMs within putative regulatory sequences in ASD subjects vs. controls. We employed multiple annotations to identify variants with possible regulatory effects, such as epigenomic modification patterns in brain and predicted

deleteriousness from computational methods<sup>24–26</sup>. Based on these burden analyses, we estimated the effect sizes of different types of regulatory mutations, measured as relative risks. Combining these estimates with the frequencies of mutations, we estimated the contribution of different types of mutations to the variation of autism risk (liability) across individuals. Next, we aimed to identify specific genes and regulatory elements underlying autism. We hypothesize that an ASD risk gene may be disrupted in multiple ways: by coding mutations changing protein function, or by regulatory mutations affecting gene expression level, or by splicing mutations. This motivates a strategy of combining coding and non-coding mutations within/near a gene to assess its role in autism. To optimally combine information from multiple mutational categories, we used a method we developed previously, TADA (*Transmission and de novo association*)<sup>27</sup>. TADA assesses the enrichment of DNMs in a gene relative to random expectation, weighing each mutation based on its likely effect size (Fig. 1).

Using this computational framework, we found modest enrichment of *de novo* single nucleotide variations (SNVs) in individuals with ASD in brain-active enhancers near genes with likely roles in psychiatric disorders, as well as in positions affecting RNA splicing. Our conservative estimates suggest that regulatory non-coding mutations contribute to about a third of *de novo* autism risk (i.e. autism risk attributable to all DNMs). Although the sample size of WGS is only a tenth of that of WES, we still identified three new ASD risk genes at a FDR < 0.1 and 11 at a FDR < 0.3. Multiple lines of evidence support the possible roles of these genes in ASD.

## Results

### WGS data of ASD and control families

We combined DNM data from five WGS studies of ASD trios/quartets, including four published<sup>28–31</sup> and one unpublished (Wu et al. See Methods for details), with a total of 300 affected subjects (Supplementary Table 1). As controls, we used recently published whole-genome DNM data from a large cohort of 700 unaffected trios<sup>32</sup>. Mutation data is limited to *de novo* SNVs. The validation rate of *de novo* SNVs based on Sanger sequencing ranges from 85% to 94% in the six studies.

Largely in line with published mutation rates<sup>29,33,34</sup>, the number of DNMs per subject in ASD studies ranges from 57 to 63. The rate of DNMs in controls is lower (39), which could be due to differences in sequencing depth, SNV calling procedures, or other factors. In subsequent analysis of a particular mutation type (e.g. mutations within enhancers), we accounted for the differences in the total mutation rates between cases and controls by comparing the relative mutation rates with neutral mutations (e.g. synonymous mutations) serving as background (see Methods). Despite the differences in absolute mutation rates, the mutational patterns are similar between cases and controls (see Section 2.1-2.3 of Supplementary Methods, also Supplementary Figs. 1, 2, and 3).

We were able to replicate the findings of earlier WES studies using the coding mutations. We found that nonsynonymous mutations from WGS data are about 1.2 fold enriched in individuals with ASD versus controls (Fig. 2a), similar to previous numbers<sup>6,35,36</sup>. The burden (i.e. fold of enrichment) is higher for nonsynonymous mutations within known ASD genes, genes likely involved in neuropsychiatric disorders (dubbed “neuropsychiatric genes”), and genes intolerant to mutations (Fig. 2a, See Methods for gene-set definitions). The burden of highly expressed brain genes (from Brainspan: <http://www.brainspan.org>) is also higher than genes with lower expression (Fig. 2a).

### Enrichment of functional *de novo* non-coding mutations in children with ASD

To establish the importance of non-coding sequences in autism, we analyzed DNMs in putative regulatory sequences of the brain. Enriched DNMs in these regions comparing with random expectation would suggest that at least some of these DNMs are causative mutations. We used fetal and adult brain H3K27ac regions as markers of regulatory activity<sup>37,38</sup>. We limited our analysis to H3K27ac regions within 10 kb of transcription start sites (TSSs) of protein-coding genes, including promoters and 5'UTR (promoters are defined as sequences within 1 kb upstream of TSSs). We found 1.1 fold enrichment of *de novo* SNVs in promoters with H3K27ac marks (active promoters), compared to *de novo* synonymous mutations though the results are not statistically significant (Fig. 2b). In contrast, we found no enrichment of *de novo* SNVs in promoter/5'UTR regions without H3K27ac marks (Fig. 2b). We also saw no enrichment of *de novo* SNVs across all H3K27ac regions within 10 kb of TSSs (referred to as regulatory SNVs

hereafter) (Fig. 2b). Noncoding variants that disrupt or create transcription factor binding motifs have been frequently associated with regulatory effects and complex phenotypes<sup>39,40</sup>. Indeed, we found a significant ASD burden for motif-changing SNVs (see Methods for definition) in H3K27ac enhancers ( $P = 0.00019$ , one-sided Fisher's exact tests were used in all burden analyses). Notably, the commonly used annotations for non-coding variants, including GERP++<sup>25</sup>, PhyloP<sup>41</sup> and CADD<sup>24</sup> and Eigen<sup>42</sup>, were not significantly associated with mutational burden (Fig. 2b and Supplementary Table 2).

We hypothesized that regulatory sequences near ASD risk genes harbor excess noncoding mutations, as suggested by an earlier study<sup>23</sup>. We found a 1.8-fold enrichment of regulatory SNVs near ASD genes ( $P = 0.069$ ) and a 1.2-fold enrichment near neuropsychiatric genes ( $P = 0.032$ ) (Fig. 2c). In contrast, we observed no enrichment of regulatory SNVs near genes that are unlikely to be ASD risk genes (nonASD genes). Additionally, we found that SNVs falling into more distal H3K27ac regions (10 kb - 50 kb to TSSs) are not enriched in known ASD or neuropsychiatric genes (Fig. 2c).

Because of the concern of potential batch effects between ASD cases and controls, we performed simulation-based alternative burden analyses, without using control data. The procedure is based on reshuffling of DNMs in cases across enhancers according to estimated mutation rates. We found that the burdens of motif-changing SNVs and of regulatory SNVs near neuropsychiatric genes are similar to what we found in Figs. 2b and 2c ( $P = 0.025$  and  $0.0017$ , respectively, Supplementary Table 3).

To show that the enrichment of regulatory SNVs is due to regulatory functions of H3K27ac sequences, rather than to some generic properties of enhancers (such as higher GC content<sup>43</sup>), we compared the burdens of SNVs in enhancers with strong activities in the developing cortex (denoted as "brain-specific enhancers") vs. enhancers with strong activities in other tissues ("non-brain specific enhancers"). The numbers of such enhancers are small, so we extended the distance cutoff to 1 Mb around TSSs. Within brain-specific enhancers, the burdens of regulatory SNVs near known ASD genes, neuropsychiatric genes, and intolerant genes are all higher than baseline

(though not significant because of the small mutational counts, Fig. 2d). In contrast, the corresponding burdens are all below 1 for enhancers specifically active in other tissues (Fig. 2d).

Non-coding mutations may also become pathogenic by affecting pre-mRNA splicing. Using the predictions from a recent paper<sup>26</sup>, we found significant burdens of SNVs likely affecting RNA splicing (splicing SNVs) in neuropsychiatric genes (Fig. 2e,  $P = 0.011$ ) and in genes intolerant to mutations (Fig. 2e,  $P = 0.018$ ). In contrast, the SNVs that are not predicted to affect splicing show no such patterns (“non-splicing” mutations in Fig. 2e).

In summary, we found multiple lines of evidence supporting the roles of regulatory and splicing mutations in autism (see Supplementary Table 4 for detailed results of all burden analyses). The specificity of our findings (e.g. we found burden in brain-specific enhancers but not enhancers specific to other tissues) and the robustness of our results to different ways of performing burden analysis argue that the results are due to true biological signals, rather than batch effects from heterogeneous samples. We summarized the evidence supporting this claim in Section 2 of Supplementary Methods.

### Partition of ASD risk into coding and non-coding DNMs

We next assessed the relative contribution of non-coding versus coding DNMs to ASD liability. We considered four classes of mutations: loss-of-function (nonsense and frameshift indels in coding sequences), probably damaging missense (predicted by PolyPhen-2, denoted as Mis3), regulatory SNVs, and splicing SNVs. The contribution of any type of mutation is measured as Liability Variance Explained (LVE), taking into account both the mutational target sizes and the average relative risks of mutations (see Methods). Note that our relative risks are defined on mutations of causative genes. We used a strategy previously developed to translate results of previous burden analysis into average relative risks of causal genes.<sup>27</sup> For coding mutations (LoF and mis3), we used values estimated previously<sup>8</sup>. For regulatory and splicing SNVs, we used the burden results from ASD genes with TADA q-value  $< 0.5^{35}$  (see Methods and Section 3 of Supplementary Methods for details and possible caveats).



Our relative risk estimates of regulatory SNVs and splicing SNVs are significantly lower than those of coding SNVs, but regulatory SNVs are much more frequent (Table 1). Each class of mutation explains only a small fraction of estimated total ASD genetic risk (Table 1), which is broadly consistent with the conclusion of an earlier study<sup>44</sup>. Considering only the risk due to *de novo* mutations, we found that non-coding SNVs (including regulatory SNVs and splicing SNVs) explain 31% of the *de novo* risk (Fig. 2f). We argue that this estimate is very conservative. First, we considered only enhancers within 10 kb of TSSs, which constitute about 36% of all enhancers in our data. Second, our dataset contains only regulatory sequences active very early in development (5, 7, and 12 post-conception week) or in the adult brain. Many enhancers active in other related developmental periods are not covered in our data. Third, we only considered SNVs in this study. *De novo* indels and CNVs, which are likely to be much more deleterious, were ignored.

# Identification of ASD risk genes using both coding and noncoding mutations

We performed integrative risk gene mapping using both coding and non-coding mutations. The challenge posed by combining different types of mutations is that these mutations could have very different damaging effects (e.g., nonsense mutations are generally more deleterious than other mutations). Summarizing a gene's mutational burden in a manner agnostic to each mutation's likely consequence would compromise the power to detect risk genes. We adopted TADA<sup>27</sup>, to address this issue. Briefly, TADA assesses the evidence of risk on each gene by comparing the observed number of mutations in each mutational class (e.g. LoF or missense) with the expected number. The evidence of each class is weighted by the average relative risk of that class, and the evidence of all classes is combined into a single Bayes factor for the gene, reflecting the strength of evidence (Fig. 1). In earlier studies, we have shown that TADA is much more powerful for mapping risk genes than simple counting of mutation numbers in genes<sup>8,35</sup>. In this study, we considered four classes of DNMs: LoF and mis3 coding mutations, regulatory SNVs within 10 kb of TSS and splicing SNVs. For each class of mutations, we derived its average relative risk from mutational burden analysis (Table 1), and estimated the mutation rate of each class for each gene using a genome-wide mutation rate model<sup>45</sup>. Once we computed the results of all genes from TADA, we corrected for multiple testing using Bayesian FDR<sup>46</sup>.



TADA analysis with only coding mutations from a previous WES study (~3,500 samples) identified 58 ASD risk genes at  $FDR < 0.1$ <sup>35</sup>. Adding regulatory SNVs and splicing SNVs from our WGS data added three new ASD risk genes at  $FDR < 0.1$ , and 11 new genes at  $FDR < 0.3$ . These predictions are robust to TADA parameters within a reasonable range (Supplementary Table 5). Each of the three genes at  $FDR < 0.1$  (Table 2) has at least one LoF or Mis3 mutation, and the evidence for these genes is strengthened by the presence of regulatory SNVs. We found extensive evidence supporting the plausibility of these genes as ASD risk genes. *APBB1* is the target of neuronal-RNA binding protein FMRP, whose loss of function causes Fragile X syndrome and autistic features. All of the three genes have been identified as haploinsufficient genes<sup>47,48</sup> (Table 2, hypergeometric test,  $P = 0.00079$ ) and are highly expressed in the brain (top 25% of all genes,  $P = 0.015$ ). The genes also tend to be evolutionarily constrained using either RIVS or another metric based on frequency of LoF variants in ExAC (Table 2). Evolutionary constraint in the human population has been shown to be a strong predictor of autism genes<sup>45</sup>.

We performed multiple network analyses to further establish the link of new candidate genes to autism. DAWN<sup>49,50</sup> is a recently developed method that predicts autism risk genes by virtue of the genes' association with known ASD genes in co-expression networks of early developing brain. We found two out of three new genes (*JUP* and *ARHGAP5*) have DAWN q-value  $< 0.05$  in at least one of the two critical developmental spatial-temporal windows for ASD<sup>51</sup> (Table 2, enrichment  $P = 0.00041$ ). Using GeneMania<sup>52</sup>, we found additional evidence supporting the connections between high-confidence ASD genes and our candidate genes. Between the two gene sets, there are 75 co-expression links in GeneMania (Fig. 3a), significantly higher than chance expectation ( $P = 0.014$ ). To better understand the functions and biological processes that the candidate genes are involved in, we obtained the top 30 neighboring genes of each candidate using GeneMania (Supplementary Table 6). Gene Ontology (GO) enrichment analysis of the top 30 neighbors of the whole set of new ASD genes identified multiple biological processes related to neuro-development, such as “negative regulation of neurogenesis” and “forebrain development” (Table 3).

We next expanded the analysis to the 11 new genes at  $FDR < 0.3$ . We observed significant enrichment of multiple gene annotations (Supplementary Table 7), including haploinsufficient genes ( $P = 0.014$ ), FMRP targets ( $P = 0.010$ ), Gene Ontology “Brain” ( $P = 0.024$ ), constrained genes ( $P = 0.0038$  using RVIS and  $P = 0.025$  using variant frequency in ExAC), high expression level in the early developing brain from BrainSpan ( $P = 0.011$ ) and genes significantly co-expressed with known ASD genes from DAWN analysis ( $P = 0.00013$ ). The pathogenic roles of these genes in ASD are further supported by previous studies (Supplementary Table 8).

We next explore the mechanisms by which non-coding mutations may contribute to ASD. We found an interesting example in *PLXNB1* (a new risk gene with  $q = 0.22$ ). This gene has important functions in neurodevelopment (see Discussions). In the promoter region of *PLXNB1*, an SNV disrupts the binding motif of the transcription factor RFX2 (Fig. 3b). Notably, in the motif-matching region, multiple bases including the one hit by the DNM, are highly conserved based on GERP scores (Fig. 3b). RFX2 is a transcription factor highly expressed in the tegmental region of the fetal mid-brain, a region linked to cognitive abilities<sup>53</sup> and social reward processing<sup>54,55</sup>. An intronic variant in *RFX2* has been associated with schizophrenia and bipolar disorder<sup>56</sup>. Additionally, the RFX2 binding motif is enriched in regulatory regions of several co-expression gene modules (Modules 1, 5, 7, and 15)<sup>37</sup> that are active in the early developing brain. Taken together, our analyses offer a testable hypothesis: the mutation in *PLXNB1* promoter changes the affinity of RFX2, and as a result, perturbs the expression of *PLXNB1* and hence increases the risk of ASD.

### Enhancers with recurrent *de novo* mutations

Our previous analyses were performed at the gene level, and only considered enhancers within 10 kb of TSSs. We expanded these analyses to identify specific H3K27 enhancers with roles in autism across the genome, based on the notion that multiple DNMs in a single enhancer are unlikely to occur by chance. We found 25 enhancers with two or more SNVs in ASD cases, significantly higher than random expectation (Fig. 3c,  $P = 0.0025$ ). Since the expected number of recurrent enhancers by chance is about 12, we estimated that half of these enhancers are likely to be causal enhancers (Supplementary Table 9). Many recurrent enhancers are distant from genes, so the

nearest genes may not represent their true targets. We used predicted enhancer-gene pairs based on cross-tissue correlation between enhancer activity and gene expression from Roadmap Epigenomics ([http://khuranalab.med.cornell.edu/roadmap\\_stringent\\_enhancers.txt](http://khuranalab.med.cornell.edu/roadmap_stringent_enhancers.txt)). We found a recurrent enhancer targeting *ZMIZ1*, a gene missed in previous analysis as it is more than 250 kb away from the enhancer (Fig. 3d). The region contains two other DNMs in two enhancers, one of which also has correlated activities with the *ZIMZ1* promoter. A target of FMRP, *ZMIZ1* is highly expressed in the brain and its protein product interacts with neuron-specific chromatin remodeling complex (nBAF) which is important in regulating synapatic functions<sup>57,58</sup>. Several nBAF members have been linked to autism, such as ARID1B and BCL11A<sup>59</sup>. The pathogenic potential of *ZMIZ1* is further implicated by the observation of a *de novo* gene-disrupting translocation in an individual with intellectual disability<sup>60</sup>. These evidence together strongly support the role of *ZMIZ1* in autism, and also highlight the mechanism that DNMs may increase ASD risk by disrupting distal regulatory elements.

We next performed recurrent DNM analysis at the level of Topologically associated domains (TADs)<sup>61</sup>. These are megabase-sized chromatin interaction domains that are stable across cell types and have been proposed to demarcate transcriptional regulatory units<sup>61</sup>. We reason that if we identify TADs with excess regulatory SNVs, it may be straightforward to assign target genes of these regulatory SNVs. Based on estimated mutation rates, we found two TADs with a significant (at FDR < 0.125) number of regulatory SNVs (Supplementary Fig. 5 and Supplementary Table 10). In both TADs, there are only two or three genes, and we conjecture that SRBD1 and MRSA are likely the underlying ASD genes in the two TADs, respectively (see Discussion).

### Power of mapping ASD risk genes with WGS and WES

We used simulations to address how the power of a DNM-focused WES or WGS study depends on its sample size and sequencing budget, using our insights of the *de novo* genetic architecture of ASD (Table 1). We randomly chose 1000 genes as risk genes based on previous estimates of the total number of ASD risk genes<sup>8,62</sup>; randomly sampled mutations according to mutation rates and their likely relative risks (causal genes tend to have more deleterious mutations compared to expectations) and then applied TADA to identify risk genes at  $q < 0.1$  (see Section 6 of

Supplementary Methods for simulation details). We found that the power of our simulated WES studies is roughly in line with empirical discoveries (Fig. 4a). For example, at N = 2,500 trios, we would expect to identify about 30-40 ASD genes, similar to the actual number (33) from a previous study<sup>8</sup>. The power of the simulated WGS design is about 20% higher than that of the WES (Fig. 4a). We next investigated whether the additional power gained from WGS is justifiable on the basis of cost. At the current per-sample cost level (WES: \$500 and WGS: \$1000), we found that WES is still more cost-effective (Fig. 4b).

## Discussion

Our analysis provides clear evidence that non-coding mutations play an important role in the etiology of autism. We found elevated rates of *de novo* SNVs in ASD subjects within brain enhancers that are likely to affect transcription factor binding. Near potential risk genes of ASD and other neuropsychiatric disorders, there is an excess of ASD-derived DNMs in enhancer regions. We also found enrichment of splicing-affecting SNVs in ASD and neuropsychiatric genes as well as in constrained genes. Compared with coding mutations, we found that these non-coding mutations account for a smaller but substantial proportion of *de novo* ASD risk. Using a statistical framework, TADA, we were able to leverage both coding and regulatory mutations for gene mapping and identified several new ASD genes. Our study on non-coding mutations also led to the characterization of ASD risk units with excess DNMs at the level of enhancers and TAD regions. Altogether, our findings highlight the importance of regulatory variants in ASD and their utility in mapping risk genes and functional elements. The analytic framework for *de novo* mutations we developed in this work is applicable to any trio-based sequencing studies.

Our work is one of the first studies that directly assess the role of non-coding regulatory variants in complex diseases<sup>23</sup>. Previously, our knowledge of non-coding variants came mostly from GWAS. The challenge with GWAS is that regulatory elements are generally much shorter (~1kb) than regions of linkage disequilibrium (LD, hundreds of kb on average). It is thus far from straightforward to assess the quantitative contribution of non-coding variants, or identify specific regulatory elements underlying diseases from GWAS<sup>63</sup>. In contrast, using DNMs from WGS, we

eliminate the impact of LD and work directly on putative causal mutations. The results of our findings thus can be interpreted more straightforwardly. For instance, the enhancers with recurrent DNMs we identified are good candidates for further experimental analysis.

Distinguishing likely pathogenic variants from benign ones is essential when analyzing non-coding variants. We only observed a modest enrichment of DNMs in H3K27ac enhancers near putative risk genes, but not across all genes. This suggests that most SNVs within H3K27ac sites are probably not causative mutations. We tested various methods for annotating variants, including GERP++<sup>25</sup>, PhyloP<sup>41</sup>, CADD<sup>24</sup>, and Eigen<sup>42</sup>, but none was found to enrich pathogenic mutations. Two possible explanations are: (1) Cross-species evolutionary constraint may be only modestly correlated with pathogenicity in humans<sup>64</sup>. (2) Two of these methods, CADD and Eigen, were trained on epigenomic data from mostly non-brain tissues. To better analyze the non-coding genome, we need a more comprehensive repertoire of regulatory information in brain, within specific spatial-temporal contexts<sup>65</sup>.

A recent study estimated the contributions of common variants, rare inherited variants and DNMs to the risk of autism, and concluded that most of the autism risk is explained by common variants<sup>44</sup>. Our goal here is not to explain ASD risk *per se*, but use DNMs to explore the relative contributions of coding and non-coding variants. While risk partition among different types of variants has been pursued in GWAS<sup>63</sup>, linkage disequilibrium limits our ability to do this, as discussed previously. Our work thus provides independent evidence that non-coding variants make a substantial contribution to the risk of complex diseases<sup>63</sup>. Comparing with the previous study of autism, our estimate of ASD risk attributable to coding mutations is somewhat higher (1.9% vs. 1.1%) and in particular we found a significant contribution from missense DNMs (0.83% vs. 0.04%). We believe that this higher estimate is largely due to our different modeling assumptions: we treated all mutations in a category (e.g., missense) as a mixture of causal and non-causal mutations, whereas the previous study treated all mutations in a category equally (see Methods)<sup>44</sup>. We estimated that *de novo* coding (1.9%), non-coding (0.9%) and copy number variants (1.46%, estimated by a previous study<sup>44</sup>) together contribute at least 4.2% of ASD risk. We think that we significantly under-estimated the contribution of non-coding mutations to ASD risk as we did not

take into account mutations in more distal regulatory regions or in ASD-relevant enhancers not covered by our datasets, and indels or CNVs disrupting regulatory sequences.

We have identified three new ASD risk genes whose expression patterns and biological functions are consistent with their putative roles in ASD risk. JUP is a member of the catenin/cadherin superfamily which has important roles in neuron connections and interactions<sup>66</sup>. It is strongly expressed in the primate prefrontal cortex and hippocampus<sup>67</sup>. *APBB1* is an adaptor protein localized in the nucleus and has a role in Alzheimer's disease. It is down-regulated in ASD cerebellum than control<sup>68</sup>, and its microexons are mis-regulated in the brains of ASD individuals<sup>20</sup>. *ARHGAP5* negatively regulates RHO GTPase activity. It is required for normal neural development, and is implicated in axonal branching and synapse formation<sup>69,70</sup>.

The pathogenicity of most of the new ASD genes at FDR < 0.3 is supported by functional and association studies (summarized in Supplementary Table 8). For example, *PLXNB1* is a receptor in the GTPase signaling pathway that regulates the development of hippocampal neurons<sup>71,72</sup>, remodeling of dendrites<sup>73</sup>, and the plasticity of axons<sup>74,75</sup>. *PLXNB1* expression has been found to be altered in the prefrontal cortex of schizophrenia patients<sup>76</sup>. Another example is *DPYSL2*, a multifunctional adaptor protein within the central nervous system<sup>77</sup>. *DPYSL2* interacts with various binding partners to regulate multiple biological processes critical in neuron development, including axon initiation and elongation<sup>77,78</sup>, neurite outgrowth<sup>79</sup>, neuronal differentiation<sup>80</sup>, and neurotransmitter release<sup>81</sup>. Functional variants in *DPYSL2* have been found to increase the risk of schizophrenia<sup>82,83</sup>. Only two of our new ASD genes (*MSL2* and *PPMID*) have not been functionally implicated in neuro-development. However, *PPMID* has recently been identified as a novel risk gene for intellectual disability<sup>84</sup>.

We also found that the two TAD regions with excess regulatory SNVs in ASD are supported by copy number variant (CNV) studies. In one TAD, recurrent, rare CNVs (Chr2: 45455651-45984915) spanning the entire *SRBD1* gene (the only protein coding gene disrupted by the CNVs within this TAD) were reported in ASD subjects<sup>85</sup>. In a later independent study, CNVs in this TAD region were found to be enriched in ASD cases versus controls<sup>85</sup>. These results suggest that *SRBD1* is likely the risk gene in this TAD. In the other TAD region, ASD-associated duplication of 8p23.1-



8p23.2 introduces a breakpoint between MSRA and RP1L1<sup>86</sup>. MSRA is a member of the methionine-sulfoxide reductase system whose function is to alleviate oxidative stress. Increased exposure to oxidative stress plays an important role in the pathogenesis of ASD<sup>87</sup>. In addition, GWAS studies have established associations of MSRA with schizophrenia<sup>88</sup> and bipolar disorder<sup>89</sup>. All these evidence together suggests that MSRA is a strong candidate gene for autism.

We investigated the power of WES and WGS studies using simulation. We note that the power of WGS is significantly underestimated for the same reasons, described previously, that the contribution of non-coding mutations to ASD risk is under-estimated. Additionally, WGS would enable much better identification of structural variants, which collectively make a significant contribution to the autism risk. Finally, we did not account for the cost of recruiting patients, which would further favor choosing WGS over WES, as WGS requires a smaller cohort to achieve the same level of power.

In summary, our work established genome-wide DNM analysis as a powerful strategy for mapping genes and regulatory elements underlying autism. By leveraging multiple types of mutations perturbing the activity and expression of genes, we gain considerable power over using protein-coding variants alone. Furthermore, comparing with protein-coding genes, regulatory elements are typically active in specific cell types and brain regions, thus the knowledge of autism-related regulatory elements may help us identify important neuronal subtypes and circuits relevant to autism, a crucial step for understanding its mechanisms<sup>3</sup>. With lowering cost of genome sequencing and better annotations of regulatory genomes in the brain<sup>65</sup>, we anticipate that whole-genome DNM studies will transform our understanding of neuropsychiatric disorders.

## Methods

### DNMs from whole genome sequencing data

The detailed information for each WGS dataset is summarized in Table S1. To remove erroneously called *de novo* SNVs, we excluded 8 individuals with more than 140 (2 times more than the median



of ASD DNMs per individual) DNMs and removed all recurrent DNMs (i.e. exactly the same mutation in multiple individuals). Our unpublished (Wu et al.) DNM data are from WGS of 32 ASD trios of Han Chinese ancestry (see Section 1 of Supplementary Methods for details, data are available at <http://wwwdev.ebi.ac.uk/eva/?eva-study=PRJEB14713>).

### Collection of brain cis-regulatory regions

We used H3K27ac sites in fetal and adult brains to define cis-regulatory regions in our main analyses. Fetal brain sites from human cortex at embryonic stages 5 p.c.w., 7 p.c.w., and 12 p.c.w. were obtained from a recent study<sup>37</sup>. For each stage, only peak regions consistent between two biological replicates were selected. Adult brain sites were obtained from Roadmap Epigenomics Project<sup>38</sup>. They include H3K27ac sites from human angular gyrus, anterior caudate, cingulate gyrus, middle hippocampus, inferior temporal lobe, mid-frontal lobe and substantia nigra. We used MACS2 to call peaks from raw data, and only kept peak regions consistent between two biological replicates for each brain region. We used BEDtools<sup>90</sup> to merge H3K27ac sites from fetal and adult brain.

To define brain-specific enhancers in Fig. 2d, we compared H3K27ac data from human embryonic cortex with publicly available H3K27ac datasets for the colon, the esophagus and limbs<sup>37,91</sup>. For each H3K27ac dataset, only replicated peaks were included and any peak with 1-bp overlap to a Gencode(v19) annotation feature was excluded. A single composite multi-sample enhancer annotation was generated by merging replicated peaks across all tissue samples. The level of H3K27ac signal in each region for each sample was quantified by averaging read counts per kilobase per million mapped reads (RPKM) in each region from each replicate. Each region was represented by a vector of a length equal to the total number of tissues considered, with each element representing the RPKM value of marking in that region for a single tissue. Each vector was standardized to have zero-mean and unit-variance. The matrix of these normalized tissue quantification values was then subjected to k-means clustering to identify sets of sites exhibiting the strongest marking in each tissue relative to all other samples in the comparison.

### Annotation of regulatory mutations

We annotated DNMs within regulatory regions using various bioinformatics tools. To limit our analysis to motifs that are most likely to be ASD-relevant, we used JASPAR core vertebrate TF motifs<sup>92</sup> that meet two criteria: (1) they are enriched in regulatory sequences of gene modules that are adjacent to regulatory sequences active in developing cortex of human, but not other primates<sup>37</sup>; and (2) their cognate transcription factors are in the top 50% brain-expressed genes (Expression levels based on mean expression levels across Brainspan samples). To identify motif-changing SNVs, for each SNV, we generated a 41-bp wild-type sequence centering on the reference allele, along with a 41-bp mutant sequence centering on the mutated allele. We then used FIMO<sup>93</sup> to obtain its maximal motif score difference (log(ratio of p-values)) in absolute value between its wild-type and mutant sequences. A SNV whose maximal absolute motif score difference is in the top 10% among the difference of all SNVs was defined as a motif SNV. We used ANNOVAR to annotate coding mutation types and obtain GERP++ scores for all mutations<sup>94</sup>. CADD scores were downloaded from <http://cadd.gs.washington.edu/score>, (default parameters, v1.3). Other annotations that we used include PhyloP scores from the 100-way PhyloP wiggle file from UCSC ([/goldenpath/hg19/phyloP100way/](http://goldenpath/hg19/phyloP100way/)) and Eigen-PC scores<sup>42</sup>.

# Lists of genes used in burden analyses

Known ASD genes include genes with q-value < 0.3 from a combined analysis of CNVs, indels, and WES data using TADA<sup>35</sup>, SFARI category I (high confidence) and II (strong candidate) genes (<https://sfari.org>), AutismKB genes<sup>95</sup> and ASD genes summarized in a previous study<sup>96</sup>. Neuropsychiatric genes are a larger set of genes likely involved in neuropsychiatric disorders, including genes with TADA q-value < 0.5<sup>35</sup>, SFARI genes (<https://sfari.org>), AutismKB genes<sup>95</sup>, ASD risk genes summarized in a previous study<sup>96</sup>, intellectual disability genes<sup>97</sup>, the union of gene sets enriched with SCZ *de novo* coding mutations<sup>98</sup> and high confidence postsynaptic density genes<sup>99</sup>. The set of nonASD genes are the 1000 genes with the highest TADA q-values<sup>35</sup>. The size of this gene set is comparable to that of neuropsychiatric genes. Intolerant genes include genes with top 5% RVIS<sup>64</sup> and haploinsufficient genes obtained from two sources, one using copy number variations (genes with predicted haploinsufficient probability greater than 0.95)<sup>47</sup>, and the other using estimated mutation rate<sup>48</sup>. To define tolerant gene, we started with genes with RVIS scores

in the bottom 10%<sup>64</sup>, genes with haploinsufficient probability smaller than 0.1<sup>47</sup>, and genes that were used as control genes for LoF deficient genes<sup>48</sup>. We then removed any genes that were in the intolerant gene set. To define gene groups based on their expression levels, we used the average expression level for each gene across all developing brain tissues from BrainSpan data.

#### Burden analysis of different types of *de novo* mutations

In burden analysis, we accounted for the difference in mutation rate between ASD subjects (~60/individual) and controls (~39/individual) as follows. Instead of comparing absolute mutation rates, we normalized the mutation counts in the regions of interest by the mutation counts of some background sequences that should not be enriched with risk mutations. This relative mutational frequency is thus comparable between ASD and controls.

Specifically, for the burden analysis of coding sequences, we first calculated the ratio of nonsynonymous mutations and synonymous mutations for both ASD and control samples. This ratio can be thought of as the relative frequency of nonsynonymous mutations in cases or controls. The burden of nonsynonymous mutations is then the ratio between the relative frequency of nonsynonymous mutation of ASD subjects and that of control subjects:

$$\text{Coding burden} = \frac{\text{ASD nonsynonymous SNVs} / \text{ASD synonymous SNVs}}{\text{control nonsynonymous SNVs} / \text{control synonymous SNVs}}$$

The p-value of the burden was calculated from Fisher's exact test.

We defined splicing SNVs as SNVs whose delta-splicing scores predicted by SPIDEX<sup>26</sup> are in the lower 10% of all the SNVs in our studies. At this cutoff, enriched splicing SNVs near known ASD genes have been observed previously<sup>26</sup>. We defined non-splicing mutations as SNVs whose delta-splicing scores are in the middle 10%. The burden of splicing SNVs was calculated in a manner similar to coding mutation, using synonymous SNVs as background mutations.

For the burden of regulatory SNVs, we followed the same strategy but used all regulatory SNVs as background instead of synonymous mutations. The burden of regulatory SNVs with a certain annotation (or in a certain group of genes) is expressed as:

$$\text{Regulatory SNV burden} = \frac{\text{ASD regulatory SNVs with a certain annotation/all ASD regulatory SNVs}}{\text{control regulatory SNVs with a certain annotation/all control regulatory SNVs}}$$

### Burden analysis by simulation

To estimate the burden of ASD regulatory SNVs in a gene set, we sampled the number of regulatory ASD SNVs of a gene using a multinomial distribution, with the total number given by the observed number of ASD regulatory SNVs. The multinomial probability of a gene is proportional to the total mutation rate of H3K27ac regulatory regions within 10 kb of the TSS of that gene. We performed simulations 10,000 times and generated the null distribution of the total number of mutations that land in the gene set of interest. We then used this distribution to derive the empirical enrichment p-value and fold of enrichment (observed mutation number in the gene set divided by the mean of simulation distribution). To estimate the burden of motif-changing SNVs, we first shuffled the positions of ASD regulatory SNVs within all H3K27ac regulatory regions (under the same mutation-rate-based multinomial distribution used above), and then, for each new position, generated a mutant allele based on the mutational spectrum of all ASD SNVs. We counted the number of motif-changing SNVs from each of 10000 simulations, and generated a null distribution of this number, which is used to obtain enrichment p-values of the observed number of motif-changing SNVs.

### Mutation rates of regulatory sequences

We applied the tri-nucleotide mutation model developed by a previous study<sup>45</sup> to the whole-genome to derive the base-level mutation rate. The mutation rate for each functional unit (e.g., one enhancer) is defined as the sum of the per-base mutation rates<sup>27</sup> in the unit. To approximate the mutation rate of splicing SNVs for each gene, we counted the number of splicing SNVs across genes in controls, and used the ratio between this number and the total number of synonymous

mutations in controls as a scaling factor. We then multiplied this scaling factor to the synonymous mutation rate of each gene to estimate its splicing SNV mutation rate.

# Estimating the relative risks of de novo mutations

We used a strategy developed previously to estimate the average relative risk of a given type of mutation (section 6 in the Supporting Text of TADA). It is also described in the user guide of the software implementation of TADA<sup>27</sup>. Note that the relative risk of a type of mutation (e.g. missense) is interpreted as the average relative risk of a missense mutation in a causal gene. Let  $\lambda$  be the burden estimated for the mutational types of interest across all genes. Because causal genes represent only a small proportion of all genes, the relative risks in causal genes should be higher than  $\lambda$ . Let  $\pi$  be the fraction of genes that are risk genes, the relative risk of causal genes can be calculated as  $\frac{\lambda-1}{\pi} + 1$ . We used  $\pi = 0.06$  in our analysis of coding mutations, which corresponds to there being 1000 ASD risk genes<sup>9,27</sup>. For regulatory SNVs and splicing SNVs, the genome-wide burdens of these two types of mutations are not significant, so we instead limited our analysis to previously indicated ASD genes with TADA q-value  $<0.5$ <sup>35</sup>. We then converted the burden in these genes to relative risks with  $\pi = 0.5$  using the same equation. When estimating the relative risk of splicing SNVs, we removed SNVs that were predicted to be nonsynonymous mutations or that fell into the brain H3K27ac regions within 10kb of TSSs.

# Partitions of *de novo* ASD risk into coding and non-coding mutations

We treated ASD liability (risk) as a continuous trait, and estimated the percentage of variance in ASD liability explained by four types of mutations (Fig. 2f). The variation of ASD liability explained by the  $j$ -th type of mutations could be expressed as the equation below (see Supplementary Methods):

$$V_j = \beta_j^2 * p_j * (1 - p_j)$$

where  $\beta_j$  is the effect size of the  $j$ -th type of mutations at the liability scale and  $p_j$  is the probability that an individual carries a mutation of type  $j$ . Note that only causal mutations contribute to ASD liability, so both  $\beta_j$  and  $p_j$  are defined for mutations affecting causal genes. We calculated  $\beta_j$  from the relative risk of  $j$ -th type of mutation using standard quantitative genetic calculations. To obtain  $p_j$ , we calculate the total mutation rate of type  $j$  mutations (note that an individual has two copies of genomes), and then multiply this by 0.06 (fraction of ASD risk genes) to obtain the rate of causal mutations of type  $j$  (see Section 4 of Supplementary Methods for details).

### TADA analysis to map ASD risk genes

A detailed description of TADA can be found in Section 5 of Supplementary Methods and in previous publications<sup>8,27</sup>. To combine evidence of the coding and non-coding mutations for a particular gene, we multiplied the pre-computed coding-mutation Bayes factors from published work<sup>35</sup> by the non-coding Bayes factors derived from our study. If a gene does not have brain H3K27ac regions within 10 kb of its TSS, we assigned its non-coding Bayes factor to be 1. We translated the combined Bayes factor of each gene into a q-value using Bayesian FDR control.

To define new ASD genes at a particular q-value cutoff, we chose the genes with a combined q-value below the cutoff and a coding q-value above the cutoff. We then filtered out new ASD genes that do not have H3K27ac regions within 10kb of TSSs. Note that even if a gene has no evidence from non-coding mutations, its q-value could change, because the q-value depends on the distribution of Bayes factors of all genes. We also lost a few genes at each q-value cutoff: These genes have no regulatory SNVs and thus receive a small penalty to their Bayes factors.

### DAWN analysis

DAWN (Detecting Association With Networks) algorithm<sup>49,50</sup> is a guilt-by-association-based gene prediction algorithm. The fundamental assumption underlying the algorithm is that risk genes are part of a functional cluster and thus, tightly connected. A gene has a high posterior risk probability if it interacts in a network with other risk genes or has a high prior risk probability or both. We used TADA to assign each gene a p-value for the prior evidence of being an ASD risk gene. For

the underlying network, we constructed partial co-expression networks for two spatio-temporal windows, namely the mid-fetal prefrontal cortex (PFC) and the infancy mediodorsal cerebellar cortex (MD-CBC), which are indicated as high risk windows for ASD<sup>51</sup>. BrainSpan microarray dataset is used as the source for spatio-temporal gene expression data (<http://developinghumanbrain.org>).

DAWN was run separately for each above-mentioned network. We used regularization parameter ( $\lambda$ ) = 0.12, p-value cutoff = 0.1 and correlation thresholds 0.7 for PFC and 0.85 for MD-CBC, respectively. In Table 2, posterior risk scores (q-values) are shown for the candidate genes. A Dash means that the corresponding gene is not co-expressed with other risk genes in any of the spatio-temporal windows.

### GeneMania analysis

GeneMania<sup>52</sup> is a tool for studying interactions among genes in a network using various types of information, such as gene co-expression and protein-protein interactions (PPIs). We first studied the connection between our candidate genes with high-confidence ASD genes (genes with coding TADA FDR < 0.1 and genes in SFARI categories I and II, <https://sfari.org>) using co-expression data. We then chose 30 top neighboring genes for each of our new candidate genes using multiple networks, including co-localization, genetic interactions, shared pathway, physical interactions, predicted interactions and shared protein domains.

### Enhancers with recurrent *de novo* mutations

For this analysis, we used brain H3K27ac regions not overlapping with exons. We observed 25 enhancers with at least two *de novo* SNVs in ASD samples. We performed simulations to assess its significance. In each simulation, we randomly re-distributed *de novo* SNVs of all brain enhancers, following a multinomial distribution. The multinomial probability of an enhancer is the ratio between the mutation rate of that enhancer and the sum of mutation rates across all enhancers. We performed simulations 10,000 times and obtained the distribution of the number of enhancers with recurrent SNVs.



## TADs with recurrent *de novo* SNVs

For each TAD region, we calculated its regulatory mutation rate as the sum of per-base mutation rates of brain H3K27ac sites within the TAD. Under the null hypothesis, the count of regulatory SNVs follows a Poisson distribution, whose rate is the regulatory mutation rate times twice of the sample size<sup>27,45</sup>. We then calculated the Poisson *p*-value of each TAD region and used the Benjamini-Hochberg procedure to control FDR.

## Acknowledgements

We thank all members of Dr. Xin He's lab for their help. We thank members of Autism Sequencing Consortium for providing helpful comments. This work was partially supported by a SFARI (Simons Foundation Autism Research Initiative) award from Simons Foundation (award ID: 385027).

## Contributions

Y.L.[Yuwen] and X.H. led the study design and the writing of the manuscript; Y.L.[Yuwen] performed all the major analyses; E.C. performed network analysis with DAWN and GeneMania. Y.L.[Yanyu], N.K. and I.I.-L contributed to burden analyses; J.L., Y.M., Y.W., Y.J., Z.L., J.W., K.X., and Z.S.S. generated new WGS data from ASD trios, called DNMs, and calculated mutation rates for non-coding regions; R.M., M.K., E.G., and J.N. provided developing brain enhancer data, tissue-specific enhancers and contributed ideas to the burden analysis and TAD analysis; All authors contributed to the writing of the manuscript.

## Competing financial interests

The authors declare no competing financial interests.

# References

1. Folstein, S. E. & Rosen-Sheidley, B. Genetics of autism: complex aetiology for a heterogeneous disorder. *Nat. Rev. Genet.* **2**, 943–955 (2001).
2. American Psychiatric Association. *Diagnostic and Statistical Manual of Mental Disorders*. Arlington (2013). doi:10.1176/appi.books.9780890425596.744053
3. Sahin, M. & Sur, M. Genes, circuits, and precision therapies for autism and related neurodevelopmental disorders. *Science* **350**, aab3897–aab3897 (2015).
4. Wang, K. *et al.* Common genetic variants on 5p14.1 associate with autism spectrum disorders. *Nature* **459**, 528–533 (2009).
5. Anney, R. *et al.* Individual common variants exert weak effects on the risk for autism spectrum disorders. *Hum. Mol. Genet.* **21**, 4781–4792 (2012).
6. Iossifov, I. *et al.* De Novo Gene Disruptions in Children on the Autistic Spectrum. *Neuron* **74**, 285–299 (2012).
7. Neale, B. M. *et al.* Patterns and rates of exonic de novo mutations in autism spectrum disorders. *Nature* **485**, 242–245 (2012).
8. De Rubeis, S. *et al.* Synaptic, transcriptional and chromatin genes disrupted in autism. *Nature* **515**, 209–215 (2014).
9. Iossifov, I. *et al.* The contribution of de novo coding mutations to autism spectrum disorder. *Nature* **513**, 216–221 (2014).
10. Welter, D. *et al.* The NHGRI GWAS Catalog, a curated resource of SNP-trait associations. *Nucleic Acids Res.* **42**, 1001–1006 (2014).
11. Ma, Q. *et al.* A role for non-coding mutations in schizophrenia. **27**, 14299–14307 (2013).
12. Smemo, S. *et al.* Obesity-associated variants within FTO form long-range functional connections with IRX3. *Nature* **507**, 371–375 (2014).
13. Huang, F. W. *et al.* Highly recurrent TERT promoter mutations in human melanoma. *Science* **339**, 957–9 (2013).
14. Flanagan, S. E. *et al.* Next-generation sequencing reveals deep intronic cryptic ABCC8 and HADH splicing founder mutations causing hyperinsulinism by pseudoexon activation. *Am. J. Hum. Genet.* **92**, 131–136 (2013).
15. Chen, W. *et al.* Intronic deletions of tva receptor gene decrease the susceptibility to

- infection by avian sarcoma and leukosis virus subgroup A. *Sci. Rep.* **5**, 9900 (2015).
16. Claussnitzer, M. *et al.* FTO obesity variant circuitry and adipocyte browning in humans. *N. Engl. J. Med.* **373**, 895–907 (2015).
17. Krumm, N., O’Roak, B. J., Shendure, J. & Eichler, E. E. A de novo convergence of autism genetics and molecular neuroscience. *Trends Neurosci.* **37**, 95–105 (2014).
18. Zafeiriou, D. I., Ververi, A. & Vargiami, E. Childhood autism and associated comorbidities. *Brain Dev.* **29**, 257–272 (2007).
19. Didiot, M. C. *et al.* The G-quartet containing FMRP binding site in FMR1 mRNA is a potent exonic splicing enhancer. *Nucleic Acids Res.* **36**, 4902–4912 (2008).
20. Irimia, M. *et al.* A highly conserved program of neuronal microexons is misregulated in autistic brains. *Cell* **159**, 1511–23 (2014).
21. Sadakata, T. *et al.* Autistic-like phenotypes in Cadps2-knockout mice and aberrant CADPS2 splicing in autistic patients. *J. Clin. Invest.* **117**, 931–943 (2007).
22. Talebizadeh, Z. *et al.* Novel splice isoforms for NLGN3 and NLGN4 with possible implications in autism. *J. Med. Genet.* **43**, e21 (2006).
23. Turner, T. N. *et al.* Genome Sequencing of Autism-Affected Families Reveals Disruption of Putative Noncoding Regulatory DNA. *Am. J. Hum. Genet.* **98**, 58–74 (2016).
24. Kircher, M. *et al.* A general framework for estimating the relative pathogenicity of human genetic variants. *Nat. Genet.* **46**, 310–315 (2014).
25. Davydov, E. V. *et al.* Identifying a high fraction of the human genome to be under selective constraint using GERP++. *PLoS Comput. Biol.* **6**, e1001025 (2010).
26. Xiong, H. Y. *et al.* RNA splicing. The human splicing code reveals new insights into the genetic determinants of disease. *Science* **347**, 1254806 (2015).
27. He, X. *et al.* Integrated model of de novo and inherited genetic variants yields greater power to identify risk genes. *PLoS Genet.* **9**, e1003671 (2013).
28. Jiang, Y.-H. *et al.* Detection of clinically relevant genetic variants in autism spectrum disorder by whole-genome sequencing. *Am. J. Hum. Genet.* **93**, 249–63 (2013).
29. Kong, A. *et al.* Rate of de novo mutations and the importance of father’s age to disease risk. *Nature* **488**, 471–475 (2012).
30. Michaelson, J. J. *et al.* Whole-genome sequencing in autism identifies hot spots for de novo germline mutation. *Cell* **151**, 1431–1442 (2012).

- 782 31. Yuen, R. K. C. *et al.* Whole-genome sequencing of quartet families with autism spectrum  
783 disorder. *Nat. Med.* **21**, 185–191 (2015).
- 784 32. Wong, W. S. W. *et al.* New observations on maternal age effect on germline de novo  
785 mutations. *Nat. Commun.* **7**, (2016).
- 786 33. Roach, J. C. *et al.* Analysis of genetic inheritance in a family quartet by whole-genome  
787 sequencing. *Science* **328**, 636–9 (2010).
- 788 34. Campbell, C. D. *et al.* Estimating human mutation rate using autozygosity in a founder  
789 population. *Nat. Genet.* **44**, 1277–1281 (2013).
- 790 35. Sanders, S. J. *et al.* Insights into autism spectrum disorder genomic architecture and  
791 biology from 71 risk loci. *Neuron* **87**, 1215–1233 (2015).
- 792 36. Li, J. *et al.* Genes with de novo mutations are shared by four neuropsychiatric disorders  
793 discovered from NPdenovo database. *Mol. Psychiatry* **21**, 290–297 (2015).
- 794 37. Reilly, S. K. *et al.* Evolutionary genomics. Evolutionary changes in promoter and  
795 enhancer activity during human corticogenesis. *Science* **347**, 1155–9 (2015).
- 796 38. Kundaje, A. *et al.* Integrative analysis of 111 reference human epigenomes. *Nature* **518**,  
797 317–330 (2015).
- 798 39. Maurano, M. T. *et al.* Large-scale identification of sequence variants influencing human  
799 transcription factor occupancy in vivo. *Nat. Genet.* **47**, 1393–1401 (2015).
- 800 40. Pai, A. A., Pritchard, J. K. & Gilad, Y. The genetic and mechanistic basis for variation in  
801 gene regulation. *PLoS Genet.* **11**, e1004857 (2015).
- 802 41. Pollard, K. S., Hubisz, M. J., Rosenbloom, K. R. & Siepel, A. Detection of nonneutral  
803 substitution rates on mammalian phylogenies. *Genome Res.* **20**, 110–121 (2010).
- 804 42. Ionita-Laza, I., McCallum, K., Xu, B. & Buxbaum, J. D. A spectral approach integrating  
805 functional genomic annotations for coding and noncoding variants. *Nat. Genet.* **48**, 214–  
806 220 (2016).
- 807 43. Akhtar, M. M., Scala, G., Coccozza, S., Miele, G. & Monticelli, A. CpG islands under  
808 selective pressure are enriched with H3K4me3, H3K27ac and H3K36me3 histone  
809 modifications. *BMC Evol. Biol.* **13**, 145 (2013).
- 810 44. Gaugler, T. *et al.* Most genetic risk for autism resides with common variation. *Nat. Genet.*  
811 **46**, 881–885 (2014).
- 812 45. Samocha, K. E. *et al.* A framework for the interpretation of de novo mutation in human

disease. *Nat. Genet.* **46**, 944–950 (2014).

46. Newton, M. A., Noueiry, A., Sarkar, D. & Ahlquist, P. Detecting differential gene expression with a semiparametric hierarchical mixture method. *Biostatistics* **5**, 155–176 (2004).
47. Huang, N., Lee, I., Marcotte, E. M. & Hurles, M. E. Characterising and predicting haploinsufficiency in the human genome. *PLoS Genet.* **6**, e1001154 (2010).
48. Petrovski, S. *et al.* The intolerance of regulatory sequence to genetic variation predicts gene dosage sensitivity. *PLoS Genet.* **11**, e1005492 (2015).
49. Liu, L. *et al.* DAWN: a framework to identify autism genes and subnetworks using gene expression and genetics. *Mol. Autism* **5**, 22 (2014).
50. Liu, L., Lei, J. & Roeder, K. Network assisted analysis to reveal the genetic basis of autism. *Ann. Appl. Stat.* **9**, 1571–1600 (2015).
51. Willsey, A. J. *et al.* Coexpression networks implicate human midfetal deep cortical projection neurons in the pathogenesis of autism. *Cell* **155**, 997–1007 (2013).
52. Mostafavi, S., Ray, D., Warde-Farley, D., Grouios, C. & Morris, Q. GeneMANIA: a real-time multiple association network integration algorithm for predicting gene function. *Genome Biol.* **9**, S4 (2008).
53. Robbins, T. W. & Roberts, A. C. Differential regulation of fronto-executive function by the monoamines and acetylcholine. *Cereb. Cortex* **17 Suppl 1**, i151–i160 (2007).
54. Lin, A., Rangel, A. & Adolphs, R. Impaired learning of social compared to monetary rewards in autism. *Front. Neurosci.* **6**, 1–7 (2012).
55. Sepeta, L. *et al.* Abnormal social reward processing in autism as indexed by pupillary responses to happy faces. *J. Neurodev. Disord.* **4**, 17 (2012).
56. Wang, K. S., Liu, X. F. & Aragam, N. A genome-wide meta-analysis identifies novel loci associated with schizophrenia and bipolar disorder. *Schizophr. Res.* **124**, 192–199 (2010).
57. Li, X. *et al.* ZMIZ1 preferably enhances the transcriptional activity of androgen receptor with short polyglutamine tract. *PLoS One* **6**, 1–12 (2011).
58. Wu, J. I. *et al.* Regulation of dendritic development by neuron-specific chromatin remodeling complexes. *Neuron* **56**, 94–108 (2007).
59. Vogel-Ciernia, A. & Wood, M. A. Neuron-specific chromatin remodeling: A missing link in epigenetic mechanisms underlying synaptic plasticity, memory, and intellectual

disability disorders. *Neuropharmacology* **80**, 18–27 (2014).

60. Córdova-Fletes, C. *et al.* A de novo t(10;19)(q22.3;q13.33) leads to ZMIZ1/PRR12 reciprocal fusion transcripts in a girl with intellectual disability and neuropsychiatric alterations. *Neurogenetics* **16**, 287–298 (2015).
61. Dixon, J. R. *et al.* Topological domains in mammalian genomes identified by analysis of chromatin interactions. *Nature* **485**, 376–380 (2012).
62. Sanders, S. J. *et al.* Multiple recurrent de novo CNVs, including duplications of the 7q11.23 Williams syndrome region, are strongly associated with autism. *Neuron* **70**, 863–885 (2011).
63. Finucane, H. K. *et al.* Partitioning heritability by functional annotation using genome-wide association summary statistics. *Nat. Genet.* **47**, 1228–1235 (2015).
64. Petrovski, S., Wang, Q., Heinzen, E. L., Allen, A. S. & Goldstein, D. B. Genic intolerance to functional variation and the interpretation of personal genomes. *PLoS Genet.* **9**, e1003709 (2013).
65. Akbarian, S. *et al.* The PsychENCODE project. *Nat. Neurosci.* **18**, 1707–1712 (2015).
66. Takeichi, M. The cadherin superfamily in neuronal connections and interactions. *Nat. Rev. Neurosci.* **8**, 11–20 (2007).
67. Smith, A., Bourdeau, I., Wang, J. & Bondy, C. A. Expression of Catenin family members CTNNA1, CTNNA2, CTNNB1 and JUP in the primate prefrontal cortex and hippocampus. *Mol. Brain Res.* **135**, 225–231 (2005).
68. Zeidán-Chuliá, F. *et al.* Altered expression of Alzheimer’s disease-related genes in the cerebellum of autistic patients: a model for disrupted brain connectome and therapy. *Cell Death Dis.* **5**, e1250 (2014).
69. Matheson, S. F. *et al.* Distinct but overlapping functions for the closely related p190 RhoGAPs in neural development. *Dev. Neurosci.* **28**, 538–550 (2006).
70. Rico, B. *et al.* Control of axonal branching and synapse formation by focal adhesion kinase. *Nat. Neurosci.* **7**, 1059–69 (2004).
71. Laht, P., Otsus, M., Remm, J. & Veske, A. B-plexins control microtubule dynamics and dendrite morphology of hippocampal neurons. *Exp. Cell Res.* **326**, 174–184 (2014).
72. Oinuma, I., Ito, Y., Katoh, H. & Negishi, M. Semaphorin 4D/Plexin-B1 stimulates PTEN activity through R-Ras GTPase-activating protein activity, inducing growth cone collapse



in hippocampal neurons. *J. Biol. Chem.* **285**, 28200–28209 (2010).

73. Tasaka, G.-I., Negishi, M. & Oinuma, I. Semaphorin 4D/Plexin-B1-mediated M-Ras GAP activity regulates actin-based dendrite remodeling through Lamellipodin. *J. Neurosci.* **32**, 8293–8305 (2012).
74. Wolman, M. A., Regnery, A. M., Becker, T., Becker, C. G. & Halloran, M. C. Semaphorin3D regulates axon axon interactions by modulating levels of L1 cell adhesion molecule. *J. Neurosci.* **27**, 9653–9663 (2007).
75. Vodrazka, P. *et al.* The semaphorin 4D-plexin-B signalLing complex regulates dendritic and axonal complexity in developing neurons via diverse pathways. *Eur. J. Neurosci.* **30**, 1193–1208 (2009).
76. Gilabert-Juan, J. *et al.* Semaphorin and plexin gene expression is altered in the prefrontal cortex of schizophrenia patients with and without auditory hallucinations. *Psychiatry Res.* **229**, 850–857 (2015).
77. Hensley, K., Venkova, K., Christov, A., Gunning, W. & Park, J. Collapsin response mediator protein-2: An emerging pathologic feature and therapeutic target for neurodisease indications. *Mol. Neurobiol.* **43**, 180–191 (2011).
78. Cole, A. R. *et al.* GSK-3 phosphorylation of the Alzheimer epitope within collapsin response mediator proteins regulates axon elongation in primary neurons. *J. Biol. Chem.* **279**, 50176–50180 (2004).
79. Quach, T. T. *et al.* Involvement of collapsin response mediator proteins in the neurite extension induced by neurotrophins in dorsal root ganglion neurons. *Mol. Cell. Neurosci.* **25**, 433–443 (2004).
80. Patrakitkomjorn, S. *et al.* Neurofibromatosis type 1 (NF1) tumor suppressor, neurofibromin, regulates the neuronal differentiation of PC12 cells via its associating protein, CRMP-2. *J. Biol. Chem.* **283**, 9399–9413 (2008).
81. Brittain, J. M. *et al.* An atypical role for collapsin response mediator protein 2 (CRMP-2) in neurotransmitter release via interaction with presynaptic voltage-gated calcium channels. *J. Biol. Chem.* **284**, 31375–31390 (2009).
82. Liu, Y. *et al.* Functional variants in DPYSL2 sequence increase risk of schizophrenia and suggest a link to mTOR signaling. *G3 (Bethesda)*. **5**, 61–72 (2014).
83. Lee, H. *et al.* Changes in Dpysl2 expression are associated with prenatally stressed rat



offspring and susceptibility to schizophrenia in humans. *Int. J. Mol. Med.* **35**, 1574–1586 (2015).

84. Lelieveld, S. H. *et al.* Meta-analysis of 2,104 trios provides support for 10 novel candidate genes for intellectual disability. *Nat. Publ. Gr.* 5–10 (2016). doi:10.1101/052670
85. Matsunami, N. *et al.* Identification of rare DNA sequence variants in high-risk autism families and their prevalence in a large case/control population. *Mol. Autism* **5**, 5 (2014).
86. Glancy, M. *et al.* Transmitted duplication of 8p23.1–8p23.2 associated with speech delay, autism and learning difficulties. *Eur. J. Hum. Genet.* **17**, 37–43 (2009).
87. Rossignol, D. A. & Frye, R. E. Evidence linking oxidative stress, mitochondrial dysfunction, and inflammation in the brain of individuals with autism. *Front. Physiol.* **5** **APR**, 1–15 (2014).
88. Ma, X. *et al.* A genome-wide association study for quantitative traits in schizophrenia in China. *Genes, Brain Behav.* **10**, 734–739 (2011).
89. Ni, P. *et al.* Methionine sulfoxide reductase A (MsrA) associated with bipolar I disorder and executive functions in A Han Chinese population. *J. Affect. Disord.* **184**, 235–238 (2015).
90. Quinlan, A. R. & Hall, I. M. BEDTools: A flexible suite of utilities for comparing genomic features. *Bioinformatics* **26**, 841–842 (2010).
91. Cotney, J. *et al.* The evolution of lineage-specific regulatory activities in the human embryonic limb. *Cell* **154**, 185–196 (2013).
92. Mathelier, A. *et al.* JASPAR 2014: An extensively expanded and updated open-access database of transcription factor binding profiles. *Nucleic Acids Res.* **42**, 1–6 (2014).
93. Grant, C. E., Bailey, T. L. & Noble, W. S. FIMO: Scanning for occurrences of a given motif. *Bioinformatics* **27**, 1017–1018 (2011).
94. Yang, H. & Wang, K. Genomic variant annotation and prioritization with ANNOVAR and wANNOVAR. *Nat Protoc* **10**, 1556–1566 (2015).
95. Xu, L. M. *et al.* AutismKB: An evidence-based knowledgebase of autism genetics. *Nucleic Acids Res.* **40**, 1–7 (2012).
96. Betancur, C. Etiological heterogeneity in autism spectrum disorders: More than 100 genetic and genomic disorders and still counting. *Brain Res.* **1380**, 42–77 (2011).
97. Pinto, D. *et al.* Convergence of genes and cellular pathways dysregulated in autism

937 spectrum disorders. *Am. J. Hum. Genet.* **94**, 677–694 (2014).

938 98. Purcell, S. M. *et al.* A polygenic burden of rare disruptive mutations in schizophrenia.

939 *Nature* **506**, 185–190 (2014).

940 99. Bayés, A. *et al.* Comparative study of human and mouse postsynaptic proteomes finds

941 high compositional conservation and abundance differences for key synaptic proteins.

942 *PLoS One* **7**, (2012).

943

Figure 1

bioRxiv preprint doi: <https://doi.org/10.1101/077578>; this version posted September 26, 2016. The copyright holder for this preprint (which was not certified by peer review) is the author/funder, who has granted bioRxiv a license to display the preprint in perpetuity. It is made available under aCC-BY-NC-ND 4.0 International license.

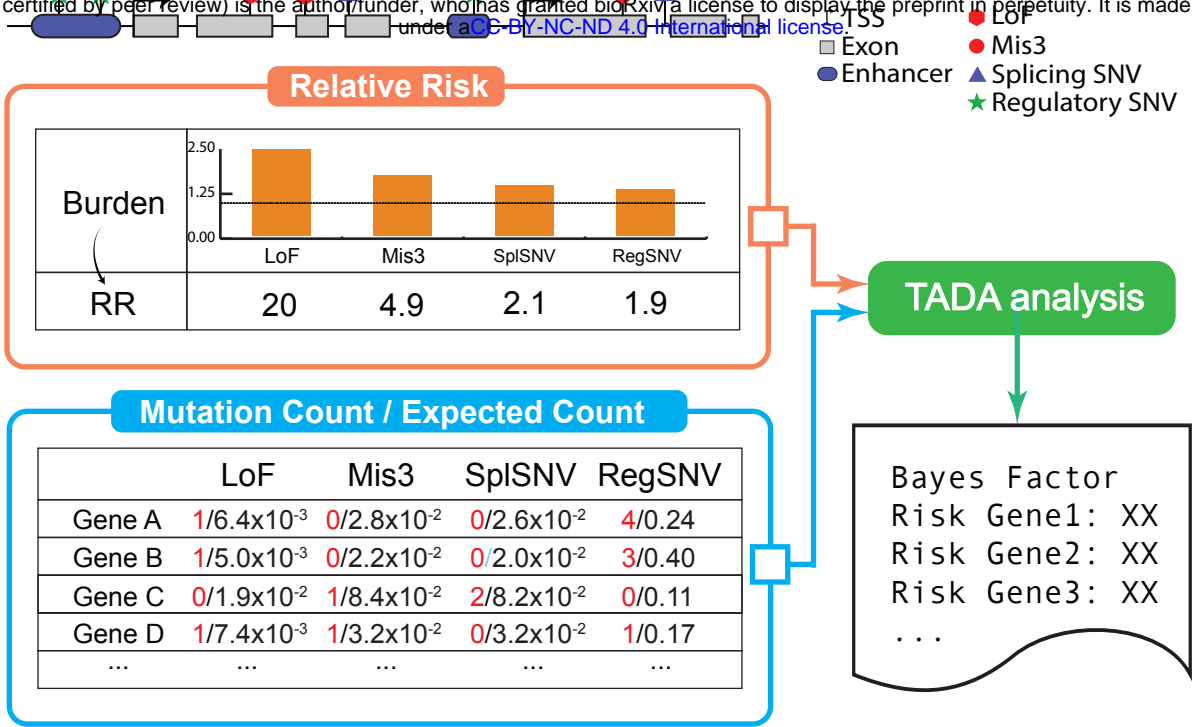

Figure 1. Overview of study design. We consider four mutational types, including LoF: Loss-of-Function coding mutations; Mis3: probably damaging nonsynonymous coding mutations predicted by Polyphen-2; SplSNV: SNVs predicted to affect pre-mRNA splicing by SPIDEX; RegSNV: non-coding SNVs that fall into brain H3K27ac regions within 10 kb of TSSs. RR denotes average relative risks of different types of mutations in risk genes. In the Mutation Count/ Expected Count Box, each cell contains the observed mutation count (colored in red) and the expected count (colored in black) (the numbers are for illustration only). TADA combines information from all mutation types related to a gene to test how likely it is to be a risk gene. The average relative risk of a mutation type is used in TADA to weigh the contribution of that type.

Figure 2

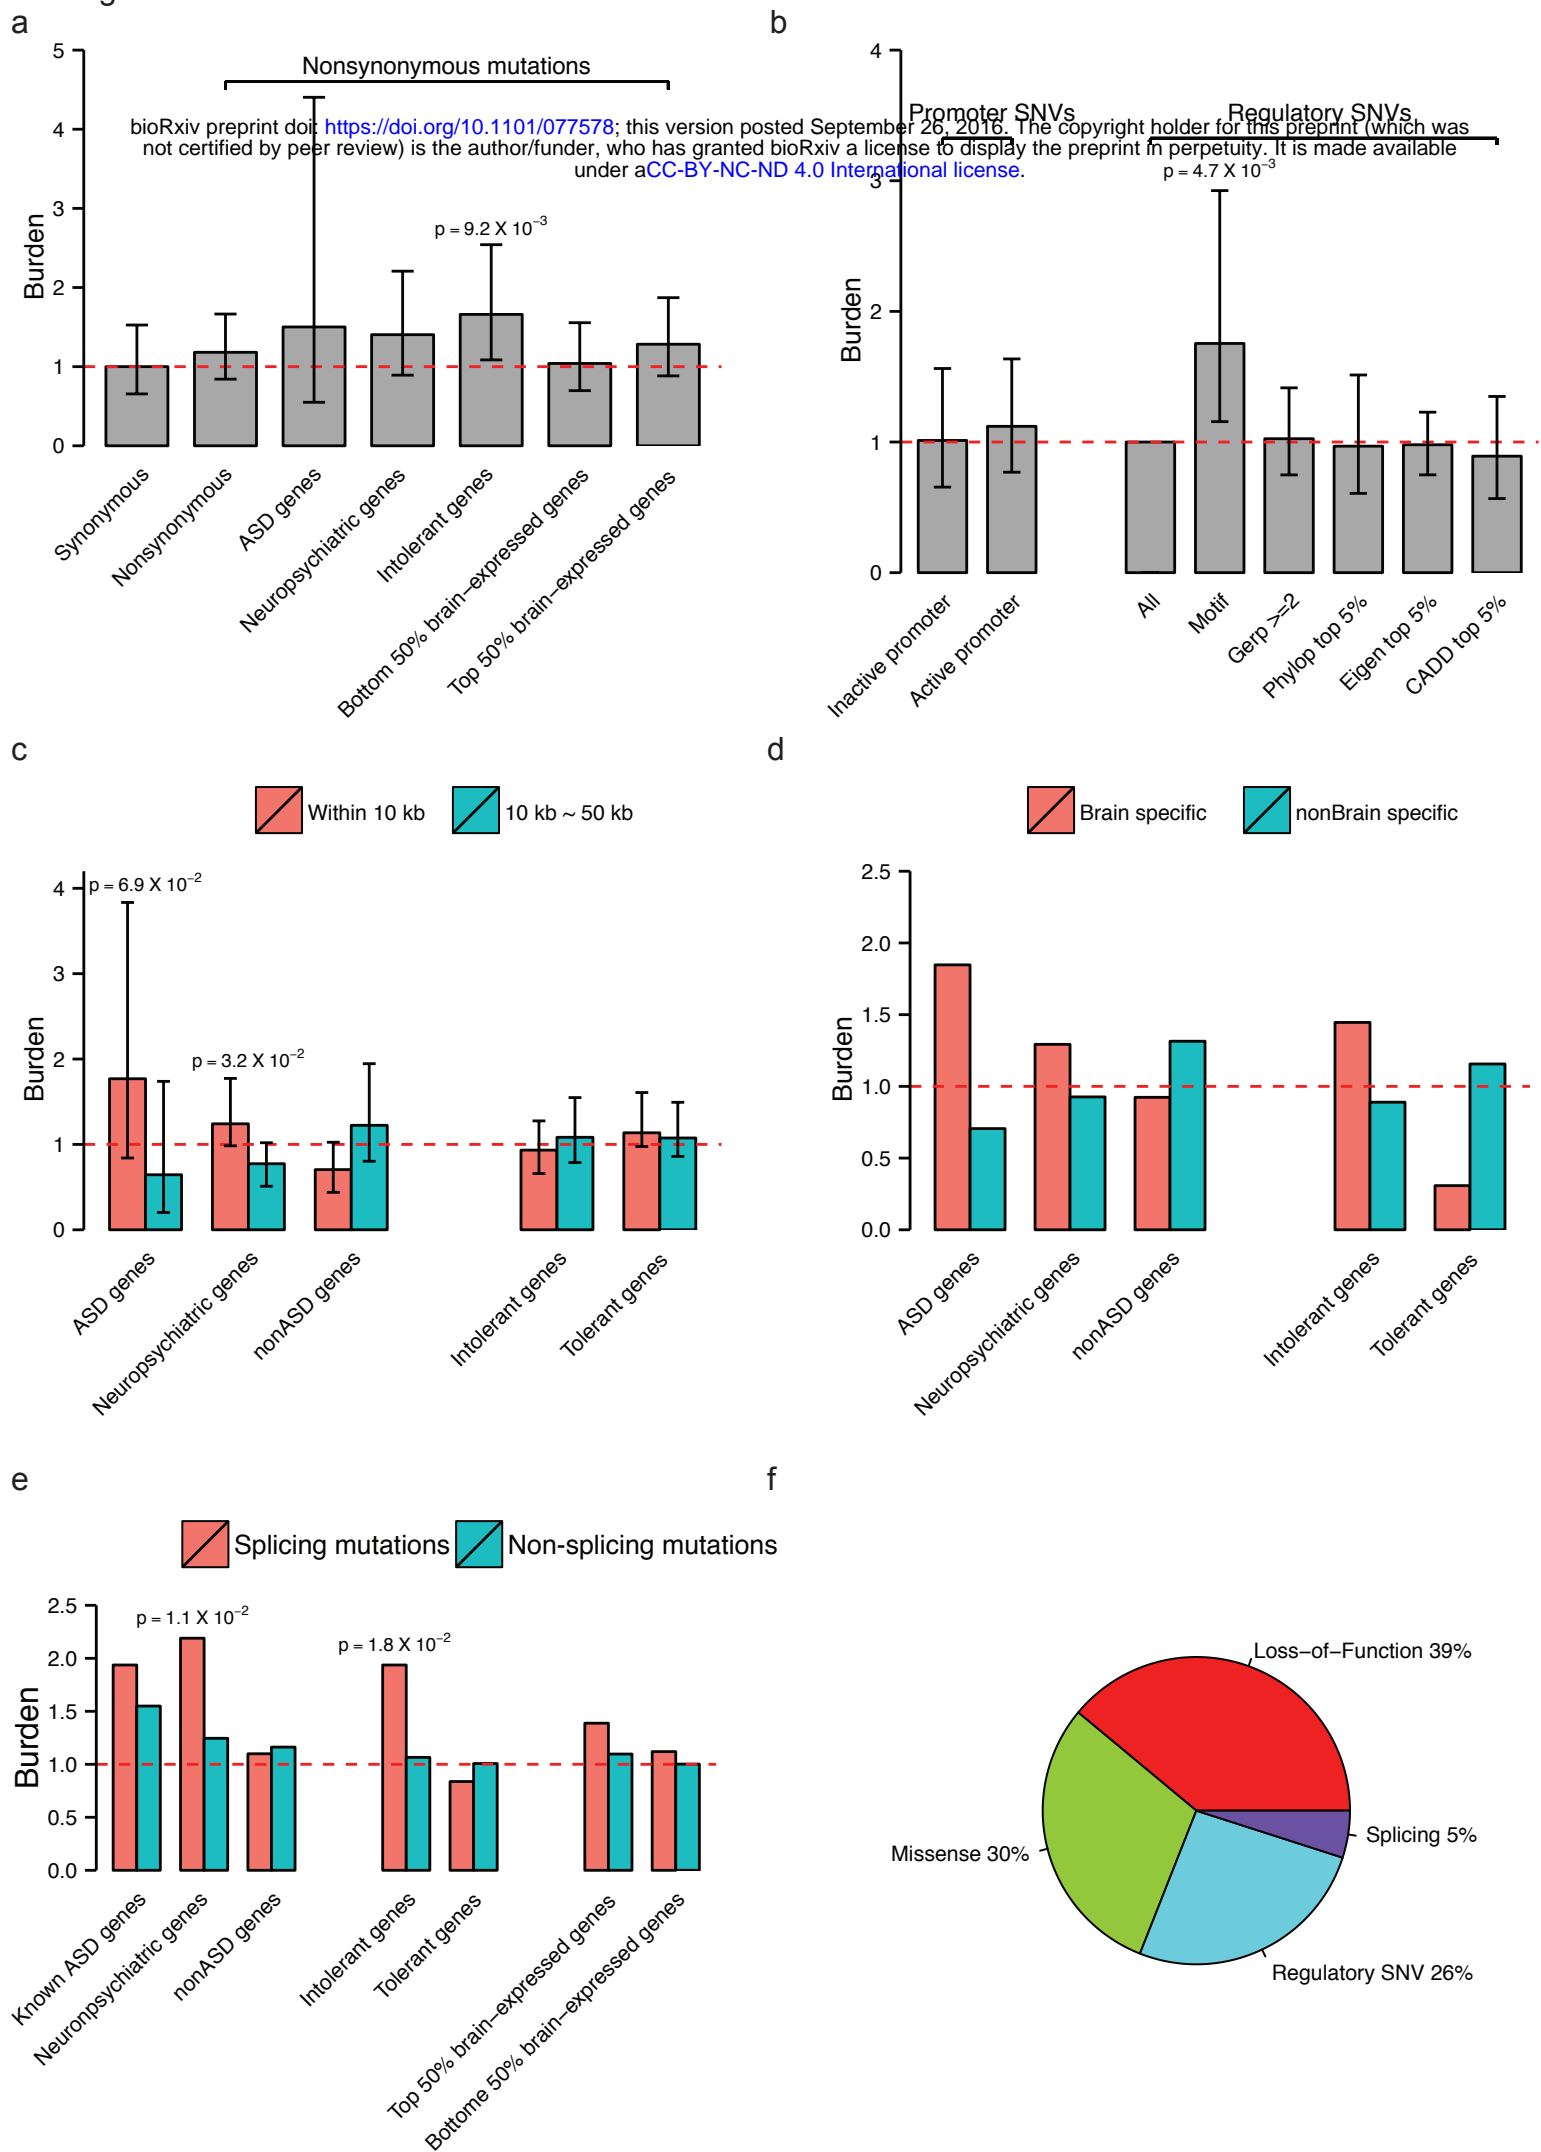

Figure 2. Burdens analyses of different types of de novo mutations. The error bars in (a), (b), and (c) represents the 95% confidence intervals of burdens based on the lower bounds and upper bounds of the odds ratios from Fisher's exact tests. We do not show error bars in (d) and (e) as they are too large to show. (a) De novo nonsynonymous mutations from WGS studies in multiple gene sets. See Methods for the definitions of these gene sets. (b) De novo SNVs in H3K27ac regions within 10 kb of TSSs. In the barplot, we show burdens of promoter/5'UTR SNVs and regulatory SNVs (including all SNVs in brain H3K27ac regions within 10 kb of TSSs). (c) Regulatory SNVs and distal regulatory SNVs (10 kb ~ 50 kb to TSSs) in different gene sets. (d) Comparison between burdens of SNVs in brain-specific H3K27ac regions and of those in other-tissue-specific H3K27ac regions. (e) Burdens of SNVs that are predicted to affect splicing vs. SNVs not predicted to have such effects (non-splicing SNVs). (f) Partition of de novo ASD risk into coding and non-coding mutations.

Figure 3

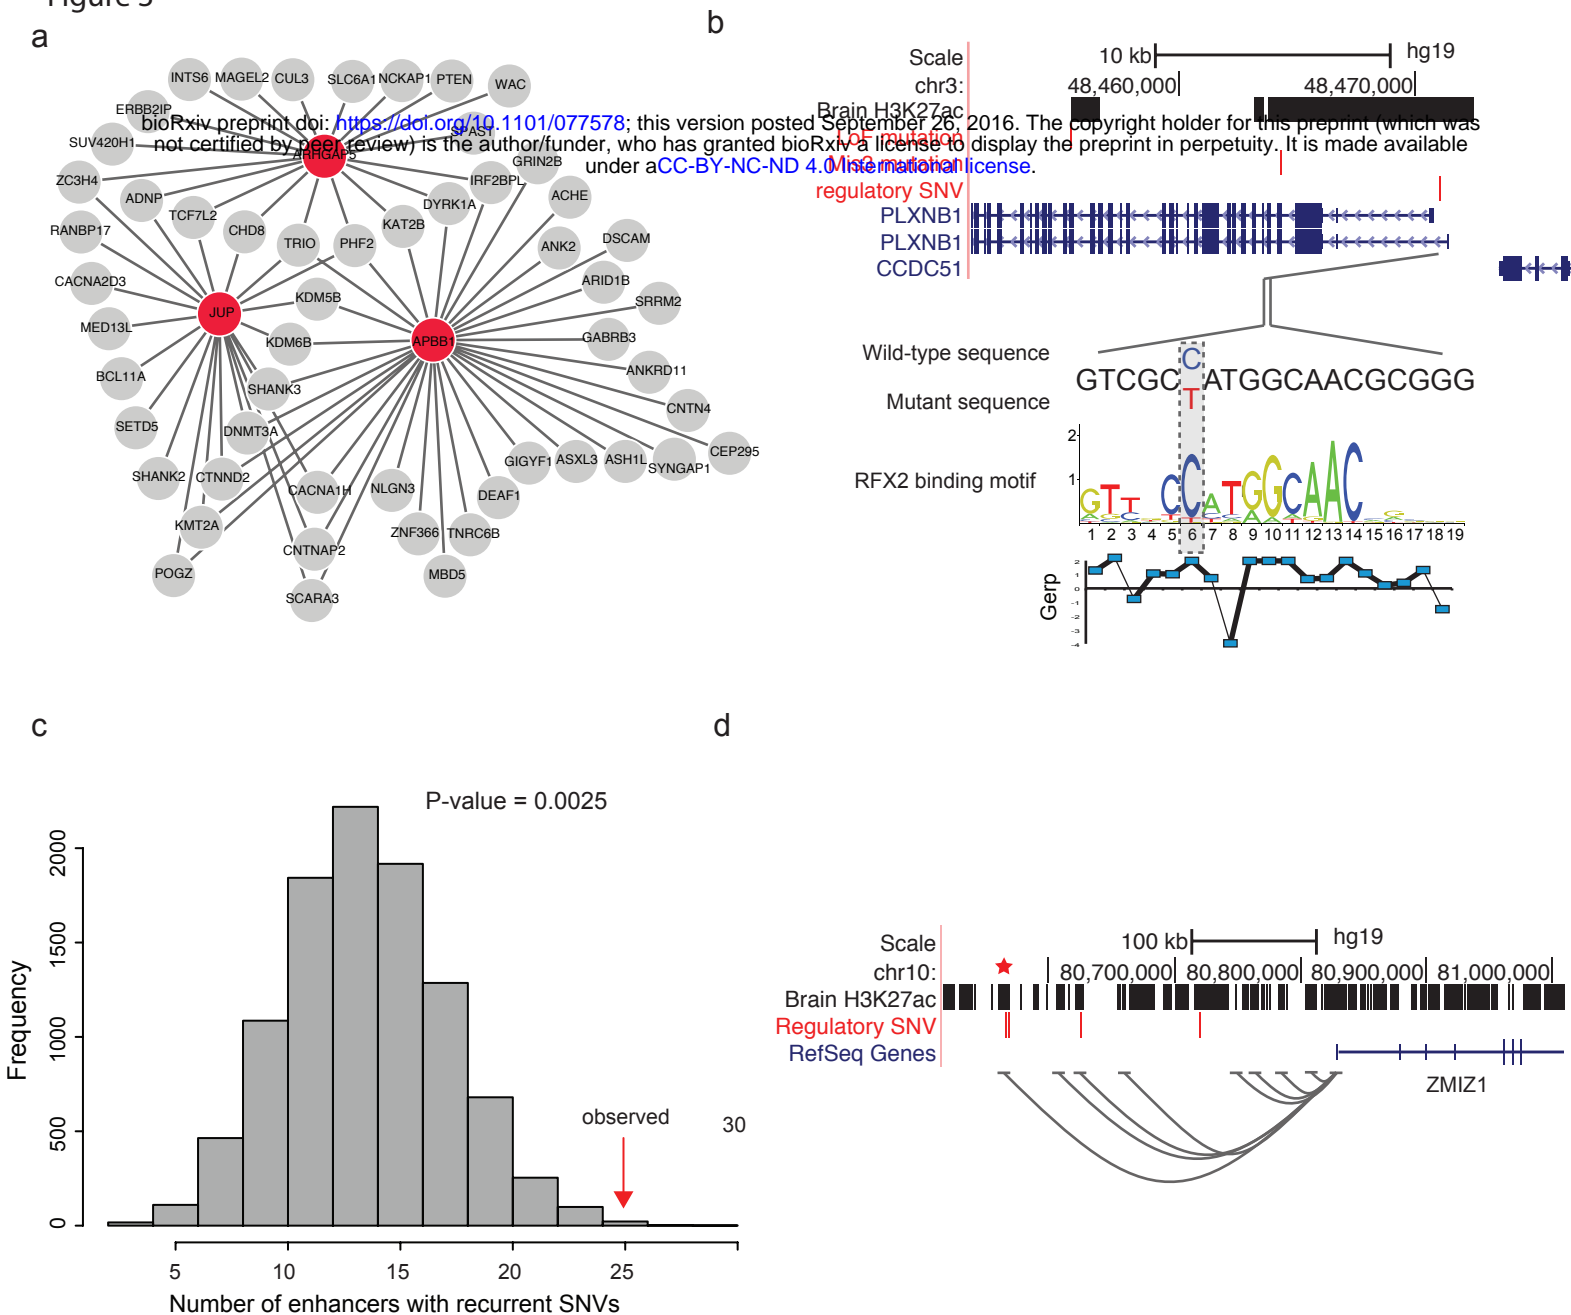

Figure 3. Predicted risk genes and enhancers of ASD. (a) GeneMania network analysis of the three new ASD genes. Red circles represent new ASD genes while grey circles represent known ones. The figure shows only the co-expression networks: two genes are connected if their co-expression across multiple tissues reaches a threshold. Only connections between the two gene sets are shown. (b) A de novo SNV in the TSS-proximal regulatory region of PLXNB1 disrupts a RFX2 binding motif. (c) Distribution of the number of enhancers with recurrent (more than two) de novo SNVs from 10,000 simulations. The vertical red arrow marks the observed number of enhancers with recurrent de novo SNVs from ASD data. (d) A plausible distal enhancer (marked by a star) with recurrent ASD SNVs has correlated activities with ZMIZ1 promoter. Grey curves represent correlated activities between enhancers and ZMIZ1 promoter.

Figure 4

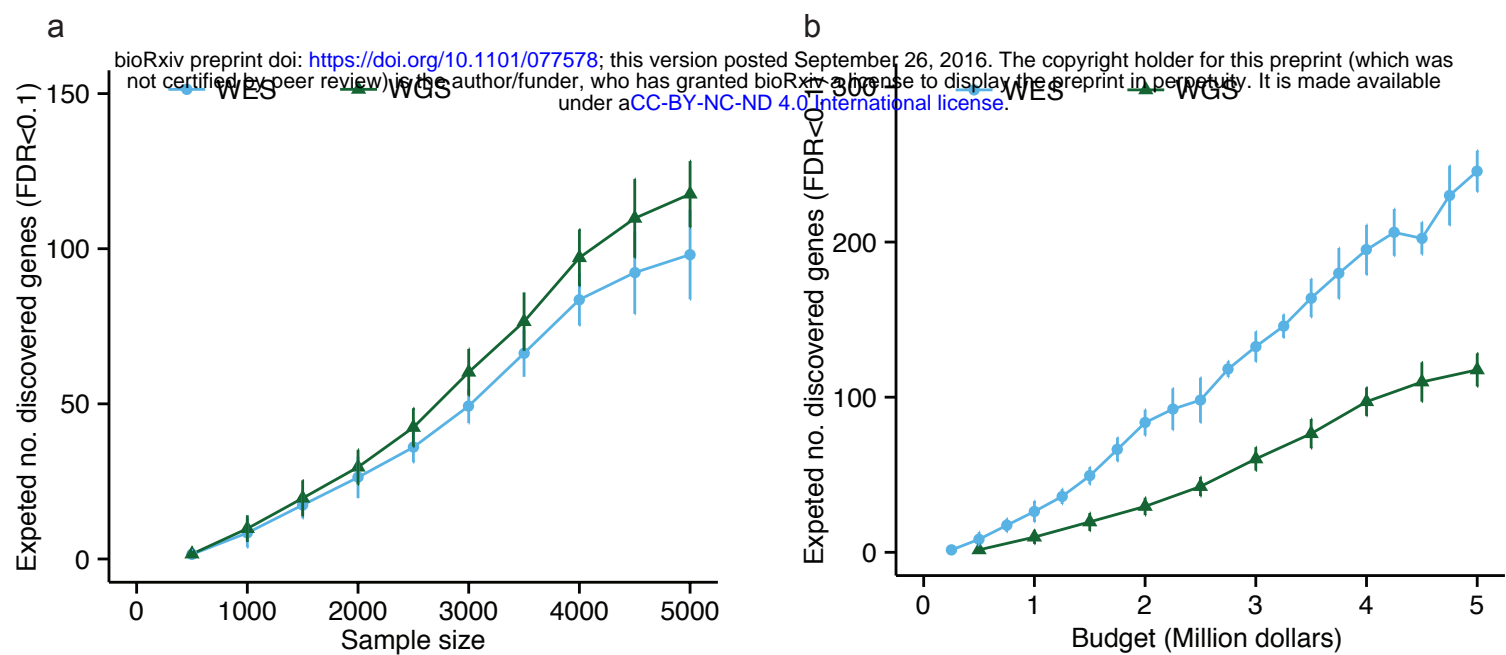

Figure 4. Comparison of power between WES and WGS from simulations. Power is measured as the expected number of discovered ASD risk genes at  $q < 0.1$ , and is obtained at each level of sample size (a) or sequencing cost (b).



Table 1. Mutational exposure (number of mutations from ASD risk genes per subject) and relative risk of different types of *de novo* mutations.

| <b>Mutation Class</b> | <b>Mutational Exposure</b> | <b>Relative Mutational Exposure(%)</b> | <b>Relative risk</b> | <b>Variance of ASD liability explained (100%)</b> |
|-----------------------|----------------------------|----------------------------------------|----------------------|---------------------------------------------------|
| Mis3                  | 0.0175                     | 11.6                                   | 4.7                  | 0.83                                              |
| Loss-of-function      | 0.00405                    | 2.68                                   | 20                   | 1.08                                              |
| Regulatory SNV        | 0.115                      | 76.1                                   | 1.9                  | 0.72                                              |
| Splicing SNV          | 0.0145                     | 9.60                                   | 2.1                  | 0.14                                              |

Table 2. Mutational counts and evidence of three new ASD genes. In the evidence rows, Y means overlap with a gene set and N otherwise.

| Gene name                | JUP     | APBB1 | ARHGAP5 | Enrichment p-value |
|--------------------------|---------|-------|---------|--------------------|
| LoF                      | 1       | 1     | 1       |                    |
| Mis3                     | 0       | 0     | 1       |                    |
| Regulatory SNV           | 4       | 3     | 1       |                    |
| HI                       | Y       | Y     | Y       | <b>7.90e-4</b>     |
| RVIS (%)                 | 2.74    | 19.93 | 20.02   | <b>1.11e-2</b>     |
| ExAC zscore (%)          | 30.62   | 14.25 | 9.69    | 1.38e-1            |
| FMRP targets             | N       | Y     | N       | 1.25e-1            |
| BrainSpan expression (%) | 19.29   | 3.41  | 22.03   | <b>1.49e-2</b>     |
| DAWN                     | 5.00e-4 | -     | 2.00e-4 | <b>4.06e-4</b>     |

Lower RVIS and ExAC zscores percentiles correspond to higher constraint.

Lower BrainSpan percentiles correspond to higher brain expression.

Enrichment p-values were calculated by hypergeometric tests. In RVIS, ExAC zscore, Brainspan, we tested the enrichment of new ASD genes in genes in the lower quartiles. In DAWN analysis, we tested the enrichment of new ASD genes in genes with DAWN q-value < 0.05. The DAWN q-value for each gene in the table is the minimum of the q-values of that gene in two brain regions, mid-fetal prefrontal cortex (PFC) and infancy mediodorsal cerebellar cortex (MD-CBC).

Table 3. Biological processes enriched among neighborhood genes of the three new ASD genes.

| Term                                                     | P-value  | Adjusted P-value | Overlap | Neighbor Genes                                        |
|----------------------------------------------------------|----------|------------------|---------|-------------------------------------------------------|
| <b>Adherens junction organization</b>                    | 1.17e-05 | 1.06e-02         | 4/69    | DSP, CTNND1, CTNNA1(APBB1); THY1(ARHGAP5)             |
| <b>Negative regulation of neurogenesis</b>               | 3.59e-05 | 1.27e-02         | 5/192   | APP, NOTCH1, LRP4(JUP); CTNNA1(APBB1); THY1(ARHGAP5)  |
| <b>Neuromuscular junction development</b>                | 5.00e-05 | 1.27e-02         | 3/34    | APP, ERBB2, LRP4(JUP)                                 |
| <b>Negative regulation of nervous system development</b> | 5.57e-05 | 1.27e-02         | 5/211   | APP, NOTCH1, CTNNA1(APBB1); LRP4(JUP); THY1(ARHGAP5)  |
| <b>Negative regulation of cell development</b>           | 9.92e-05 | 1.51e-02         | 5/239   | APP, NOTCH1, LRP4 (JUP); CTNNA1(APBB1); THY1(ARHGAP5) |
| <b>Kidney development</b>                                | 1.00e-04 | 1.52e-02         | 4/122   | MME, TSHZ3, LRP4 (JUP); ZBTB16(APBB1)                 |
| <b>Neuron remodeling</b>                                 | 1.64e-04 | 1.98e-02         | 2/8     | APP(JUP); RND1(ARHGAP5)                               |
| <b>Forebrain development</b>                             | 1.74e-04 | 1.98e-02         | 3/53    | APP, NOTCH1, APLP2(JUP)                               |
| <b>Negative regulation of neuron differentiation</b>     | 2.01e-04 | 2.04e-02         | 4/147   | APP, NOTCH, LRP4(JUP); THY1(ARHGAP5)                  |
| <b>Mating behavior</b>                                   | 2.41e-04 | 2.20e-02         | 2/10    | APP, APLP2(JUP)                                       |

Neighborhood genes are the top 30 connected genes from GeneMania analysis for the three new ASD genes. In the last column, after each set of neighbor genes (separated by semicolon) in parenthesis is their common connected new ASD gene. In the “Overlap” column, the number of neighborhood genes in each GO category is followed by the total number of genes in this GO category.
